# Supplementary material for: Dibenzothiophene-S,S-dioxide-bispyridinium-fluorene-based polyelectrolytes for cathode buffer layers of polymer solar cells
Source: Royal Society of Chemistry journal article supplement (doi:10.1039/d0py00416b), 2020-01-01
Supplement: d0py00416b1.pdf [file d0py00416b1.pdf]

*Electronic Supplementary Information*

**Dibenzothiophene-*S,S*-Dioxide-Bispyridinium-Fluorene-  
Based Polyelectrolytes for Cathode Buffer Layers of  
Polymer Solar Cells**

*Guiting Chen,<sup>\*a</sup> Dan Cheng,<sup>a</sup> Wenyan Zou,<sup>a</sup> Ziyang Cai,<sup>a</sup> Yufeng Xie,<sup>a</sup> Yaqi Chen,<sup>a</sup>*

*Baitian He,<sup>\*a</sup> Hongqing Hao,<sup>a</sup> Wei Yang<sup>b</sup> and Yong Cao<sup>b</sup>*

<sup>a</sup> School of Chemistry and Environment, Jiaying University, Meizhou 514015, China.

<sup>b</sup> Institute of Polymer Optoelectronic Materials and Devices, State Key Laboratory of  
Luminescent Materials and Devices, South China University of Technology,  
Guangzhou 510640, China.

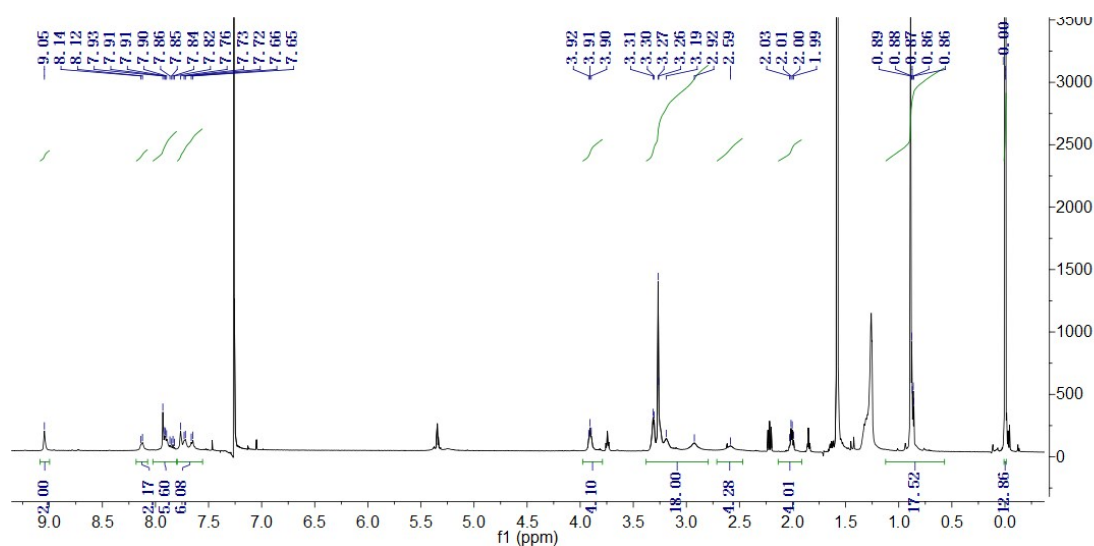

**Figure S1.** <sup>1</sup>H NMR of PFSOPy-E in CDCl<sub>3</sub>.

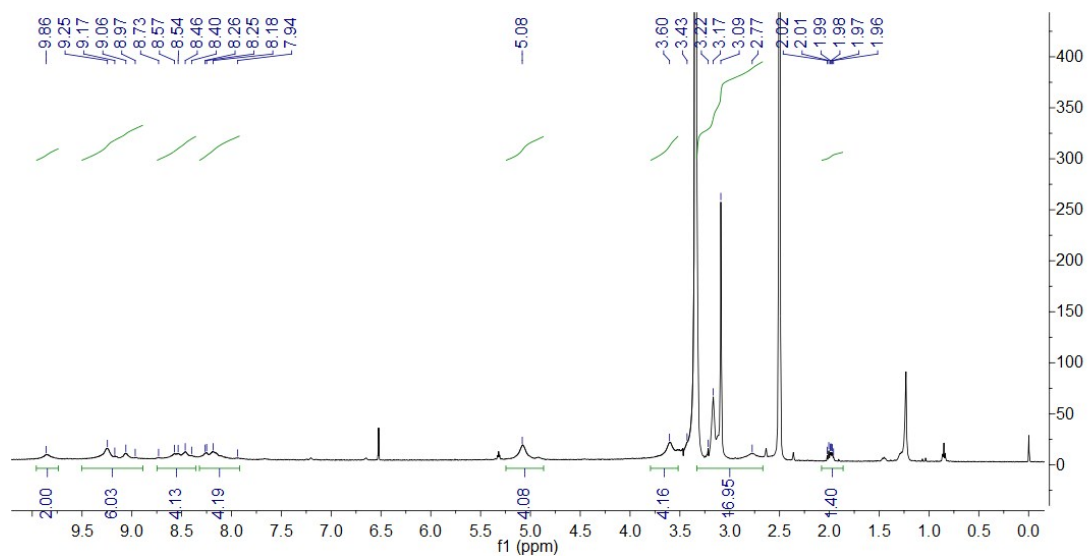

**Figure S2.**  $^1\text{H}$  NMR of PFSOPyCl-E in  $\text{DMSO-d}_6$ .

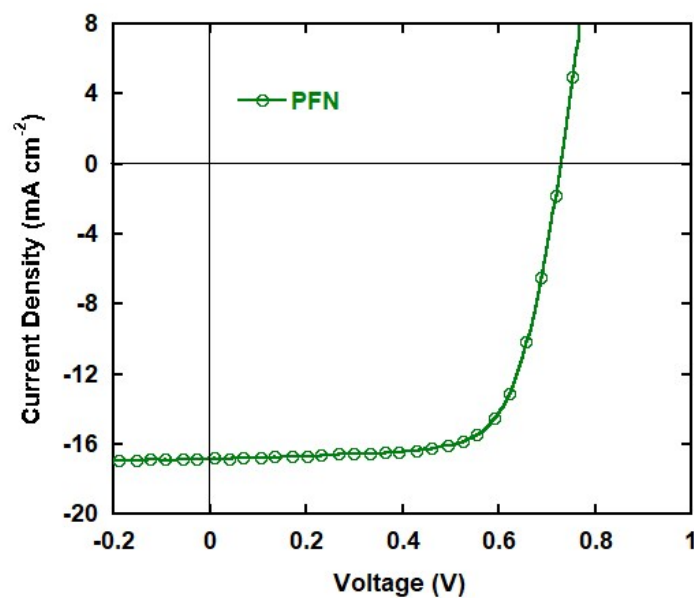

**Figure S3.**  $J$ - $V$  curve of inverted PTB7:PC<sub>71</sub>BM PSC with PFN CBL.
